# Supplementary material for: 838 オスティア・ディオスクロイの家におけるカストールとポルックスを描いたモザイク画の制作過程に関する研究(歴史・意匠)
Source: Royal Society of Chemistry journal article supplement (doi:10.1039/d1fo01682b), 2012-03-01
Supplement: d1fo01682b1.pdf [file d1fo01682b1.pdf]

**An integrated strategy using LC-MS/MS combined with *in vivo* microdialysis for simultaneous determination of lignans of *Schisandra chinensis* (Turcz.) Bail.**

**Fructus and endogenous neurotransmitters: Application to pharmacokinetic and pharmacodynamic study**

Jun Fu<sup>a,b</sup>, Hongxu Zhang<sup>a,b</sup>, Shu Liu<sup>b</sup>, Jiajie Wu<sup>a,b</sup>, Yuying Zhang<sup>a,b</sup>, Yang Gao<sup>a,b</sup>, Fengrui Song<sup>b</sup>, Yuhua Qin<sup>c</sup>, Xiuli Hu<sup>a</sup>, Zhongying Liu<sup>a\*</sup>

**Affiliation**

<sup>a</sup> *School of Pharmaceutical Sciences, Jilin University, Changchun 130021, China.*

<sup>b</sup> *National Center of Mass Spectrometry in Changchun & Jilin Provincial Key Laboratory of Chinese Medicine Chemistry and Mass Spectrometry, Changchun Institute of Applied Chemistry, Chinese Academy of Sciences, Changchun, 130022, China.*

<sup>c</sup> *Hainan Tropical Marine University, Sanya, 572022*

\* Corresponding author: Zhongying Liu, School of Pharmaceutical Sciences, Jilin University, Changchun 130021, China.

E-mail address: liuzy@jlu.edu.cn

## **Table of contents**

1. Table S1 in page 3.

Table S1 The *in vitro* recoveries for all analytes determined by gain method (n=3)

| Comp              | Con<br>(ng/mL) | Blood prob                             |                  |                  |                  |                  | Brain prob                             |                  |                  |                  |                  |
|-------------------|----------------|----------------------------------------|------------------|------------------|------------------|------------------|----------------------------------------|------------------|------------------|------------------|------------------|
|                   |                | Flow rate ( $\mu\text{L}/\text{min}$ ) |                  |                  |                  |                  | Flow rate ( $\mu\text{L}/\text{min}$ ) |                  |                  |                  |                  |
|                   |                | 1.0                                    | 1.5              | 2.0              | 2.5              | 3.0              | 1.0                                    | 1.5              | 2.0              | 2.5              | 3.0              |
| Gomisin A         | 10             | 31.52 $\pm$ 2.20                       | 30.82 $\pm$ 8.81 | 27.22 $\pm$ 3.21 | 23.60 $\pm$ 3.84 | 19.75 $\pm$ 6.77 | 30.35 $\pm$ 3.78                       | 27.79 $\pm$ 1.33 | 25.49 $\pm$ 4.01 | 18.83 $\pm$ 2.07 | 12.69 $\pm$ 5.38 |
|                   | 200            | 32.58 $\pm$ 5.37                       | 30.17 $\pm$ 3.03 | 28.73 $\pm$ 3.67 | 24.35 $\pm$ 7.79 | 20.31 $\pm$ 5.71 | 30.90 $\pm$ 7.58                       | 28.06 $\pm$ 5.05 | 25.78 $\pm$ 5.69 | 18.73 $\pm$ 5.35 | 12.03 $\pm$ 5.96 |
|                   | 400            | 32.21 $\pm$ 5.23                       | 30.41 $\pm$ 5.69 | 27.47 $\pm$ 6.93 | 23.73 $\pm$ 8.86 | 20.15 $\pm$ 8.80 | 30.82 $\pm$ 7.83                       | 28.17 $\pm$ 3.84 | 24.55 $\pm$ 5.75 | 19.10 $\pm$ 5.82 | 12.42 $\pm$ 5.01 |
| Gomisin D         | 2              | 31.21 $\pm$ 3.81                       | 29.76 $\pm$ 8.64 | 27.59 $\pm$ 6.65 | 24.79 $\pm$ 4.56 | 20.23 $\pm$ 5.02 | 29.88 $\pm$ 9.54                       | 25.55 $\pm$ 1.07 | 23.93 $\pm$ 3.77 | 16.41 $\pm$ 3.07 | 10.69 $\pm$ 5.57 |
|                   | 200            | 32.33 $\pm$ 5.65                       | 31.82 $\pm$ 1.61 | 27.66 $\pm$ 4.48 | 25.26 $\pm$ 5.87 | 21.76 $\pm$ 3.84 | 30.18 $\pm$ 7.68                       | 25.19 $\pm$ 2.27 | 23.44 $\pm$ 5.65 | 15.26 $\pm$ 1.47 | 11.76 $\pm$ 1.20 |
|                   | 400            | 31.81 $\pm$ 2.61                       | 30.43 $\pm$ 5.44 | 26.08 $\pm$ 3.29 | 25.08 $\pm$ 4.92 | 20.62 $\pm$ 5.71 | 29.75 $\pm$ 4.79                       | 25.97 $\pm$ 3.50 | 24.45 $\pm$ 5.49 | 16.85 $\pm$ 5.46 | 11.71 $\pm$ 3.66 |
| Gomisin E         | 2              | 34.55 $\pm$ 2.04                       | 30.26 $\pm$ 2.61 | 25.84 $\pm$ 5.10 | 24.18 $\pm$ 8.04 | 20.13 $\pm$ 5.42 | 31.79 $\pm$ 7.90                       | 27.57 $\pm$ 3.88 | 24.75 $\pm$ 4.07 | 17.71 $\pm$ 3.92 | 11.69 $\pm$ 1.99 |
|                   | 200            | 34.70 $\pm$ 5.05                       | 30.24 $\pm$ 7.53 | 26.69 $\pm$ 5.17 | 24.73 $\pm$ 3.89 | 20.70 $\pm$ 6.73 | 31.32 $\pm$ 6.41                       | 27.19 $\pm$ 4.95 | 24.56 $\pm$ 3.78 | 16.75 $\pm$ 1.57 | 11.65 $\pm$ 2.03 |
|                   | 400            | 33.21 $\pm$ 6.50                       | 30.33 $\pm$ 1.74 | 26.35 $\pm$ 4.47 | 23.96 $\pm$ 3.61 | 19.95 $\pm$ 7.12 | 31.24 $\pm$ 3.84                       | 28.01 $\pm$ 5.17 | 24.40 $\pm$ 4.78 | 18.15 $\pm$ 4.38 | 12.16 $\pm$ 5.52 |
| Gomisin G         | 1              | 32.83 $\pm$ 7.05                       | 31.09 $\pm$ 8.18 | 28.29 $\pm$ 3.37 | 24.88 $\pm$ 4.42 | 21.09 $\pm$ 4.73 | 30.48 $\pm$ 8.45                       | 28.35 $\pm$ 4.36 | 25.69 $\pm$ 4.96 | 15.94 $\pm$ 2.92 | 11.55 $\pm$ 3.82 |
|                   | 200            | 33.28 $\pm$ 2.99                       | 31.56 $\pm$ 5.22 | 28.25 $\pm$ 4.77 | 25.11 $\pm$ 8.93 | 21.87 $\pm$ 5.32 | 30.17 $\pm$ 5.39                       | 28.51 $\pm$ 5.87 | 25.29 $\pm$ 5.96 | 15.83 $\pm$ 4.46 | 11.51 $\pm$ 1.31 |
|                   | 400            | 33.70 $\pm$ 6.61                       | 30.28 $\pm$ 9.64 | 28.57 $\pm$ 5.46 | 25.26 $\pm$ 4.81 | 21.32 $\pm$ 8.57 | 31.01 $\pm$ 7.17                       | 27.58 $\pm$ 2.98 | 25.38 $\pm$ 4.46 | 16.67 $\pm$ 2.30 | 12.29 $\pm$ 2.16 |
| Gomisin K1        | 1              | 33.74 $\pm$ 2.90                       | 30.15 $\pm$ 3.39 | 27.05 $\pm$ 6.85 | 24.27 $\pm$ 6.60 | 21.09 $\pm$ 4.49 | 32.89 $\pm$ 3.68                       | 28.16 $\pm$ 2.30 | 23.86 $\pm$ 2.01 | 19.34 $\pm$ 2.40 | 11.83 $\pm$ 3.99 |
|                   | 200            | 34.51 $\pm$ 8.01                       | 30.07 $\pm$ 9.10 | 27.14 $\pm$ 3.31 | 23.79 $\pm$ 6.56 | 21.51 $\pm$ 7.50 | 33.58 $\pm$ 4.79                       | 28.45 $\pm$ 1.55 | 24.43 $\pm$ 4.38 | 19.90 $\pm$ 4.03 | 10.56 $\pm$ 3.01 |
|                   | 400            | 34.20 $\pm$ 5.99                       | 30.21 $\pm$ 3.46 | 27.43 $\pm$ 3.81 | 23.63 $\pm$ 5.58 | 20.82 $\pm$ 6.44 | 33.18 $\pm$ 7.90                       | 27.81 $\pm$ 2.08 | 23.47 $\pm$ 4.37 | 18.84 $\pm$ 3.14 | 12.02 $\pm$ 3.21 |
| Benzoyl-gomisin-H | 0.5            | 34.35 $\pm$ 5.45                       | 30.55 $\pm$ 4.33 | 27.66 $\pm$ 4.63 | 22.46 $\pm$ 7.80 | 20.42 $\pm$ 8.31 | 32.95 $\pm$ 6.41                       | 25.11 $\pm$ 2.88 | 21.19 $\pm$ 4.60 | 15.86 $\pm$ 3.65 | 11.73 $\pm$ 5.21 |
|                   | 200            | 34.21 $\pm$ 3.37                       | 30.42 $\pm$ 5.00 | 27.43 $\pm$ 5.32 | 23.61 $\pm$ 6.78 | 21.77 $\pm$ 4.11 | 33.09 $\pm$ 3.84                       | 25.23 $\pm$ 2.67 | 21.15 $\pm$ 5.47 | 15.21 $\pm$ 1.70 | 11.06 $\pm$ 1.84 |
|                   | 400            | 35.09 $\pm$ 7.85                       | 31.38 $\pm$ 6.49 | 27.54 $\pm$ 5.18 | 23.59 $\pm$ 5.36 | 21.10 $\pm$ 4.68 | 33.25 $\pm$ 8.45                       | 24.75 $\pm$ 3.12 | 20.53 $\pm$ 1.53 | 15.70 $\pm$ 5.26 | 10.50 $\pm$ 1.77 |
| Angeloylgomisin Q | 2              | 33.32 $\pm$ 3.31                       | 30.74 $\pm$ 1.42 | 26.78 $\pm$ 4.75 | 24.13 $\pm$ 7.70 | 20.98 $\pm$ 3.27 | 29.92 $\pm$ 5.39                       | 27.54 $\pm$ 1.51 | 24.12 $\pm$ 3.61 | 18.88 $\pm$ 2.10 | 12.48 $\pm$ 4.81 |
|                   | 200            | 33.75 $\pm$ 6.45                       | 30.97 $\pm$ 2.44 | 26.96 $\pm$ 8.77 | 24.21 $\pm$ 5.78 | 21.18 $\pm$ 5.72 | 30.57 $\pm$ 4.79                       | 28.78 $\pm$ 1.15 | 23.25 $\pm$ 3.28 | 19.31 $\pm$ 2.23 | 11.71 $\pm$ 5.47 |
|                   | 400            | 32.64 $\pm$ 8.60                       | 30.61 $\pm$ 3.86 | 27.19 $\pm$ 3.57 | 23.88 $\pm$ 6.66 | 21.52 $\pm$ 6.65 | 30.20 $\pm$ 4.38                       | 28.86 $\pm$ 3.91 | 23.35 $\pm$ 3.24 | 19.42 $\pm$ 2.18 | 12.22 $\pm$ 4.83 |

|               |     |            |            |            |            |            |            |            |            |            |            |
|---------------|-----|------------|------------|------------|------------|------------|------------|------------|------------|------------|------------|
| Schizandrin   | 2   | 33.97±7.17 | 30.21±7.74 | 26.63±4.71 | 23.62±4.23 | 21.39±5.24 | 31.13±6.41 | 26.26±4.57 | 21.69±1.67 | 18.91±3.43 | 11.37±4.61 |
|               | 200 | 35.12±2.17 | 30.32±3.06 | 27.93±4.04 | 24.49±4.65 | 21.30±3.70 | 31.19±3.84 | 25.75±1.21 | 20.98±3.76 | 17.63±2.19 | 11.79±1.89 |
|               | 400 | 34.31±2.56 | 31.16±1.77 | 27.43±4.14 | 24.12±6.71 | 21.01±7.92 | 31.55±3.68 | 27.18±2.03 | 21.51±5.98 | 18.75±3.42 | 11.42±1.65 |
| Schisandrin A | 1   | 33.41±9.16 | 30.45±3.02 | 28.85±3.56 | 23.45±7.46 | 20.65±7.89 | 31.39±4.07 | 25.37±5.42 | 21.86±3.41 | 17.63±4.58 | 10.74±5.88 |
|               | 200 | 34.36±4.96 | 30.70±2.84 | 28.38±6.53 | 23.22±7.48 | 21.27±4.62 | 31.71±6.20 | 25.47±5.12 | 22.26±4.75 | 17.65±5.92 | 10.77±2.97 |
|               | 400 | 34.18±4.03 | 30.09±8.35 | 27.96±6.92 | 23.87±4.83 | 21.15±3.39 | 31.82±6.75 | 25.14±2.50 | 22.29±5.92 | 18.51±3.86 | 11.26±2.89 |
| Schisandrin B | 1   | 32.34±5.99 | 29.73±3.18 | 27.19±3.42 | 23.19±6.57 | 20.71±4.42 | 29.92±4.24 | 25.66±3.58 | 22.13±3.87 | 19.57±5.43 | 11.68±4.50 |
|               | 200 | 32.49±4.14 | 30.15±4.14 | 27.02±3.25 | 23.27±5.72 | 21.43±7.42 | 30.20±3.92 | 25.85±3.26 | 21.52±5.97 | 19.55±3.56 | 11.47±4.51 |
|               | 400 | 32.14±6.41 | 30.25±6.96 | 26.86±5.89 | 22.64±6.74 | 21.39±5.37 | 30.31±7.08 | 25.63±4.49 | 21.99±3.37 | 19.78±2.94 | 11.91±2.71 |
| NE            | 50  | 34.18±4.75 | 30.59±3.64 | 27.48±3.90 | 25.36±7.29 | 20.74±4.72 | 32.64±3.22 | 27.51±1.62 | 22.53±1.01 | 18.25±2.84 | 12.14±1.69 |
|               | 400 | 34.27±2.33 | 31.13±3.68 | 27.90±6.38 | 24.74±7.94 | 21.65±5.74 | 32.79±5.47 | 27.45±1.53 | 22.97±1.73 | 17.62±3.40 | 12.05±5.82 |
|               | 800 | 33.91±2.73 | 30.83±3.93 | 26.92±4.49 | 25.18±6.83 | 21.17±6.24 | 31.96±3.83 | 27.15±1.28 | 23.22±5.80 | 18.19±3.77 | 11.61±3.73 |
| 5-HT          | 2   | 35.79±5.38 | 31.97±5.57 | 29.37±4.37 | 25.81±4.38 | 19.54±4.35 | 32.77±5.47 | 27.73±2.66 | 22.79±1.80 | 14.66±3.51 | 11.03±1.92 |
|               | 200 | 35.93±4.95 | 32.07±3.06 | 29.30±4.35 | 25.64±5.04 | 19.04±4.42 | 33.12±5.28 | 27.91±1.78 | 22.43±4.36 | 15.23±4.36 | 10.41±4.60 |
|               | 400 | 35.57±1.80 | 32.12±9.43 | 28.94±8.73 | 25.59±5.05 | 19.97±5.31 | 33.19±5.96 | 28.07±1.98 | 21.87±4.43 | 14.71±2.13 | 10.84±1.26 |
| Ach           | 20  | 34.92±7.90 | 30.32±5.94 | 25.95±7.82 | 22.24±4.96 | 19.32±5.68 | 31.68±7.35 | 27.65±2.29 | 21.48±2.38 | 18.54±4.48 | 10.78±2.96 |
|               | 400 | 35.33±1.48 | 30.64±6.64 | 25.68±5.92 | 22.49±5.64 | 18.52±7.72 | 32.13±3.92 | 28.12±4.15 | 21.55±2.14 | 18.32±3.72 | 10.51±2.83 |
|               | 800 | 35.21±3.14 | 30.61±1.58 | 26.17±7.89 | 21.65±6.07 | 19.28±5.92 | 32.26±3.66 | 28.24±3.07 | 21.16±4.58 | 19.22±5.73 | 11.22±5.24 |
| GABA          | 5   | 34.95±5.04 | 31.02±5.45 | 28.39±8.48 | 23.57±7.54 | 19.58±5.57 | 30.54±5.30 | 27.07±4.45 | 23.95±2.18 | 17.59±1.29 | 11.77±5.32 |
|               | 200 | 35.06±3.70 | 30.41±1.30 | 28.61±7.69 | 23.42±4.20 | 19.59±7.30 | 30.72±4.22 | 26.63±2.54 | 23.96±3.63 | 17.57±3.56 | 12.52±3.07 |
|               | 400 | 34.73±6.52 | 30.92±1.54 | 28.41±7.14 | 23.75±4.99 | 19.84±4.76 | 29.62±2.80 | 26.96±2.13 | 23.77±2.19 | 18.22±3.18 | 12.17±1.01 |
| Asp           | 20  | 33.66±7.82 | 30.45±3.92 | 25.95±5.81 | 22.74±3.84 | 20.31±8.96 | 31.53±6.65 | 27.46±1.85 | 20.48±3.79 | 16.06±4.17 | 12.96±4.88 |
|               | 400 | 33.81±6.19 | 30.04±2.62 | 26.38±8.61 | 23.27±3.38 | 20.84±6.47 | 31.81±5.92 | 27.09±1.42 | 20.46±2.04 | 16.13±5.61 | 12.91±3.82 |
|               | 800 | 33.72±7.71 | 30.56±4.21 | 26.29±3.47 | 23.26±8.41 | 21.24±6.35 | 31.69±5.20 | 27.18±1.75 | 20.93±2.47 | 16.29±3.32 | 12.32±1.88 |
| GLU           | 20  | 35.68±5.64 | 30.81±4.94 | 27.82±3.27 | 23.85±4.81 | 20.72±8.84 | 33.63±4.49 | 28.16±3.21 | 24.94±2.82 | 19.69±1.27 | 12.56±3.12 |

---

|     |     |            |            |            |            |            |            |            |            |            |            |
|-----|-----|------------|------------|------------|------------|------------|------------|------------|------------|------------|------------|
|     | 400 | 35.40±9.45 | 31.19±7.79 | 27.56±8.82 | 23.61±6.26 | 20.35±5.04 | 34.82±8.03 | 28.02±4.77 | 25.09±4.66 | 18.94±3.70 | 12.41±2.82 |
|     | 800 | 35.97±6.31 | 31.52±4.43 | 27.53±4.45 | 23.94±7.05 | 20.58±8.52 | 34.58±4.01 | 27.91±2.11 | 25.26±2.42 | 19.76±3.68 | 12.88±2.33 |
| GLY | 50  | 34.94±5.55 | 31.57±9.46 | 27.65±4.03 | 24.64±8.88 | 19.72±3.57 | 32.94±3.35 | 28.16±3.41 | 23.58±5.45 | 15.91±1.09 | 12.69±3.01 |
|     | 400 | 34.71±5.68 | 31.96±6.63 | 27.71±6.22 | 24.50±5.11 | 19.90±8.46 | 32.97±3.98 | 28.57±3.38 | 23.97±2.55 | 16.24±3.95 | 12.62±4.94 |
|     | 800 | 34.87±6.08 | 31.79±4.71 | 26.82±4.28 | 24.71±3.99 | 19.61±6.77 | 32.53±3.51 | 27.91±5.26 | 23.83±3.18 | 16.22±3.66 | 12.55±1.33 |

---
